# Supplementary material
Source: PubMed Central journal article supplement (PMC122584)
Supplement: pnas_052548299_2.pdf [file pnas_052548299_2.pdf]

| Accession | Species                 | Host                    | Country | Year         | Strain | Region | Region | Region | Region | Region | Region          | Region | Region | Region | Region | Region | Region | Region | Region |   |
|-----------|-------------------------|-------------------------|---------|--------------|--------|--------|--------|--------|--------|--------|-----------------|--------|--------|--------|--------|--------|--------|--------|--------|---|
| IS960095  | <i>M. africanum</i>     | 6                       | human   | Nigeria      | T      | G      | C      | C      | 1      | 1      | 0               | 1      | 1      | 1      | 1      | 1      | 1      | 1      | 1      | 1 |
| IS960098  | <i>M. africanum</i>     | 9                       | human   | Nigeria      | T      | G      | C      | C      | 1      | 1      | 0               | 1      | 1      | 1      | 1      | 1      | 1      | 1      | 1      | 1 |
| IS960099  | <i>M. africanum</i>     | 10                      | human   | Nigeria      | T      | G      | C      | C      | 1      | 1      | 0               | 1      | 1      | 1      | 1      | 1      | 1      | 1      | 1      | 1 |
| IS960097  | <i>M. africanum</i>     | 8                       | human   | Guinea       | T      | G      | C      | C      | 1      | 1      | 0               | 1      | 1      | 0      | 0      | 0      | 0      | 0      | 1      | 1 |
| IS960102  | <i>M. africanum</i>     | 13                      | human   | Guinea       | T      | G      | C      | C      | 1      | 1      | 0               | 1      | 1      | 1      | 0      | 0      | 0      | 0      | 0      | 1 |
| IS960103  | <i>M. africanum</i>     | 14                      | human   | Guinea       | T      | G      | C      | C      | 1      | 1      | 0               | 1      | 1      | 1      | 0      | 0      | 0      | 0      | 0      | 1 |
| IS960105  | <i>M. africanum</i>     | 16                      | human   | Guinea       | T      | G      | C      | C      | 1      | 1      | 0               | 1      | 1      | 1      | 0      | 0      | 0      | 0      | 0      | 1 |
| IS960096  | " <i>M. africanum</i> " | 7                       | human   | Uganda       | G      | G      | *      | *      | 1      | 1      | 1               | 1      | 1      | 1      | 1      | 1      | 1      | 1      | 1      | 1 |
| IS960109  | " <i>M. africanum</i> " | 20                      | human   | Uganda       | G      | G      | *      | *      | 1      | 1      | 1               | 1      | 1      | 1      | 1      | 1      | 1      | 1      | 1      | 1 |
| 100       | 55                      | " <i>M. africanum</i> " | human   | Netherlands  | T      | C      | G      | C      | *      | 1      | 1               | 0      | 1      | 1      | 0      | 1      | 1      | 1      | 1      | 1 |
| 62        | 56                      | <i>M. microti</i>       | vole    | UK           | T      | C      | G      | C      | G      | 1      | †               | 0      | 1      | 1      | 0      | 0      | 0      | 0      | 1      | 1 |
| 25        | 57                      | <i>M. microti</i>       | vole    | UK           | T      | C      | G      | C      | G      | 1      | †               | 0      | 1      | 1      | 0      | 0      | 0      | 0      | 1      | 1 |
|           | OV 254                  | <i>M. microti</i>       | vole    | UK           | T      | G      | C      | C      | G      | 1      | †               | 0      | 1      | 1      | 0      | 0      | 0      | 0      | 1      | 1 |
|           | ATCC 35782              | <i>M. microti</i>       | nd      | nd           | T      | G      | C      | C      | G      | 1      | †               | 0      | 1      | 1      | 0      | 0      | 0      | 0      | 1      | 1 |
|           | 94/2272                 | <i>M. microti</i>       | human   | Netherlands  | T      | G      | C      | C      | G      | 1      | †               | 0      | 1      | 1      | 0      | 0      | 0      | 0      | 1      | 1 |
| 24        | 60                      | <i>M. bovis</i>         | oryx    | Saudi Arabia | T      | C      | G      | C      | G      | 1      | 1               | 0      | 1      | 1      | 0      | 0      | 0      | 0      | 1      | 1 |
| 69        | 61                      | <i>M. bovis</i>         | oryx    | Netherlands  | T      | G      | C      | C      | G      | 1      | 1               | 0      | 1      | 1      | 0      | 0      | 0      | 0      | 1      | 1 |
| 117       | 62                      | <i>M. bovis</i>         | cattle  | Argentina    | T      | C      | A      | G      | G      | 1      | 1               | 1      | 0      | 0      | 0      | 0      | 0      | 0      | 0      | 0 |
| 126       | 63                      | <i>M. bovis</i>         | cattle  | Argentina    | T      | A      | G      | G      | G      | 1      | 1               | 1      | 0      | 0      | 0      | 0      | 0      | 0      | 0      | 0 |
| 130       | 64                      | <i>M. bovis</i>         | cattle  | Netherlands  | T      | A      | G      | G      | G      | 1      | 1               | 1      | 0      | 0      | 0      | 0      | 0      | 0      | 0      | 0 |
| 73        | 65                      | <i>M. bovis</i>         | cattle  | Netherlands  | T      | C      | A      | G      | G      | 1      | 1               | 0      | 0      | 0      | 0      | 0      | 0      | 0      | 0      | 0 |
| 85 (128)  | 67 (131)                | " <i>M. bovis</i> "     | human   | Netherlands  | T      | C      | G      | C      | C      | 1      | 1               | 0      | 1      | 1      | 1      | 0      | 0      | 0      | 0      | 1 |
| 6         | 68                      | " <i>M. bovis</i> "     | human   | Netherlands  | T      | C      | G      | C      | C      | 1      | 1               | 0      | 1      | 1      | 1      | 0      | 0      | 0      | 0      | 1 |
| 81        | 39                      | <i>M. bovis</i>         | seal    | Argentina    | T      | G      | C      | C      | G      | 1      | BN <sup>§</sup> | 0      | 1      | 1      | 1      | 0      | 0      | 0      | 1      | 1 |
| 76        | 40                      | <i>M. bovis</i>         | seal    | Argentina    | T      | C      | G      | C      | G      | 1      | BN <sup>§</sup> | 0      | 1      | 1      | 1      | 0      | 0      | 0      | 1      | 1 |
| 101       | 41                      | <i>M. bovis</i>         | seal    | Argentina    | T      | C      | G      | C      | G      | 1      | BN <sup>§</sup> | 0      | 1      | 1      | 1      | 0      | 0      | 0      | 1      | 1 |
| UZ 1      | <i>M. bovis</i>         | llama                   | Spain   | T            | C      | A      | G      | G      | G      | 1      | 1               | 1      | 0      | 0      | 0      | 0      | 0      | 0      | 0      | 0 |
| UZ 2      | <i>M. bovis</i>         | human                   | Spain   | T            | A      | G      | G      | G      | G      | 1      | 1               | 1      | 0      | 0      | 0      | 0      | 0      | 0      | 0      | 0 |
| UZ 3      | <i>M. bovis</i>         | human                   | Spain   | T            | A      | G      | G      | G      | G      | 1      | 1               | 0      | 0      | 0      | 0      | 0      | 0      | 0      | 0      | 0 |
| UZ 4      | <i>M. bovis</i>         | human                   | Spain   | T            | A      | G      | G      | G      | G      | 1      | 1               | 0      | 0      | 0      | 0      | 0      | 0      | 0      | 0      | 0 |
| UZ 5      | <i>M. bovis</i>         | human                   | Spain   | T            | A      | G      | G      | G      | G      | 1      | 1               | 1      | 0      | 0      | 0      | 0      | 0      | 0      | 0      | 0 |
| UZ 6      | <i>M. bovis</i>         | cattle                  | Spain   | T            | A      | G      | G      | G      | G      | 1      | 1               | 1      | 0      | 0      | 0      | 0      | 0      | 0      | 0      | 0 |
| UZ 7      | <i>M. bovis</i>         | human                   | Spain   | T            | C      | A      | G      | G      | G      | 1      | 1               | 1      | 0      | 0      | 0      | 0      | 0      | 0      | 0      | 0 |
| UZ 8      | <i>M. bovis</i>         | human                   | Spain   | T            | C      | A      | G      | G      | G      | 1      | 1               | 1      | 0      | 0      | 0      | 0      | 0      | 0      | 0      | 0 |
| UZ 9      | <i>M. bovis</i>         | cattle                  | Spain   | T            | C      | A      | G      | G      | G      | 1      | 1               | 1      | 0      | 0      | 0      | 0      | 0      | 0      | 0      | 0 |
| UZ 10     | <i>M. bovis</i>         | human                   | Spain   | T            | C      | A      | G      | G      | G      | 1      | 1               | 0      | 0      | 0      | 0      | 0      | 0      | 0      | 0      | 0 |
| UZ 11     | <i>M. bovis</i>         | human                   | Spain   | T            | A      | G      | G      | G      | G      | 1      | 1               | 1      | 0      | 0      | 0      | 0      | 0      | 0      | 0      | 0 |
| UZ 12     | <i>M. bovis</i>         | human                   | Spain   | T            | A      | G      | G      | G      | G      | 1      | 1               | 1      | 0      | 0      | 0      | 0      | 0      | 0      | 0      | 0 |
| UZ 22     | <i>M. bovis</i>         | goat                    | Spain   | T            | C      | A      | C      | G      | G      | 1      | 1               | 1      | 1      | 0      | 0      | 1      | 0      | 0      | 0      | 0 |
| UZ 26     | <i>M. bovis</i>         | goat                    | Spain   | T            | C      | A      | C      | G      | G      | 1      | 1               | 1      | 1      | 0      | 0      | 1      | 0      | 0      | 0      | 0 |
| UZ 27     | <i>M. bovis</i>         | goat                    | Spain   | T            | C      | A      | C      | G      | G      | 1      | 1               | 0      | 1      | 0      | 0      | 1      | 0      | 0      | 0      | 0 |
| UZ 28     | <i>M. bovis</i>         | human                   | Spain   | T            | C      | A      | C      | G      | G      | 1      | 1               | 1      | 0      | 0      | 0      | 0      | 0      | 0      | 0      | 0 |
| AF2122/97 | <i>M. bovis</i>         | cattle                  | UK      | T            | C      | A      | G      | G      | G      | 1      | 1               | 1      | 0      | 0      | 0      | 0      | 0      | 0      | 0      | 0 |
| 48 (2)    | 4 (116)                 | <i>M. bovis</i> BCG     | vaccine | France       | T      | A      | G      | G      | G      | 0      | 0               | 0      | 0      | 0      | 0      | 0      | 0      | 0      | 0      | 0 |
| 71        | 59                      | <i>M. bovis</i> BCG     | vaccine | Japan        | T      | C      | A      | G      | G      | 0      | 1               | 0      | 0      | 0      | 0      | 0      | 0      | 0      | 0      | 0 |

0, region not present (blue background). 1, region present (yellow background). BN, both negative. nd, not determined.

\*Not present.

†Region partially deleted.

‡RD<sup>mic</sup>.

§RD<sup>seal</sup>.

¶RD<sup>can</sup>.
